# Supplementary material
Source: PubMed Central journal article supplement (PMC4967214)
Supplement: supp_bgw061_Supplementary_Figures.pdf [file supp_bgw061_Supplementary_Figures.pdf]

**Supplementary Figure 1.** Schematic depiction of the *Apc* gene transcript (upper) and the corresponding Apc protein (lower) with the codon number corresponding to functional domains. Location of germline *Apc*<sup>min</sup> and somatic *Apc*<sup>mmcr</sup> mutations are shown. Arrows represent primers used to amplify the *Apc*<sup>mmcr</sup> region from genomic DNA templates for DNA sequencing.

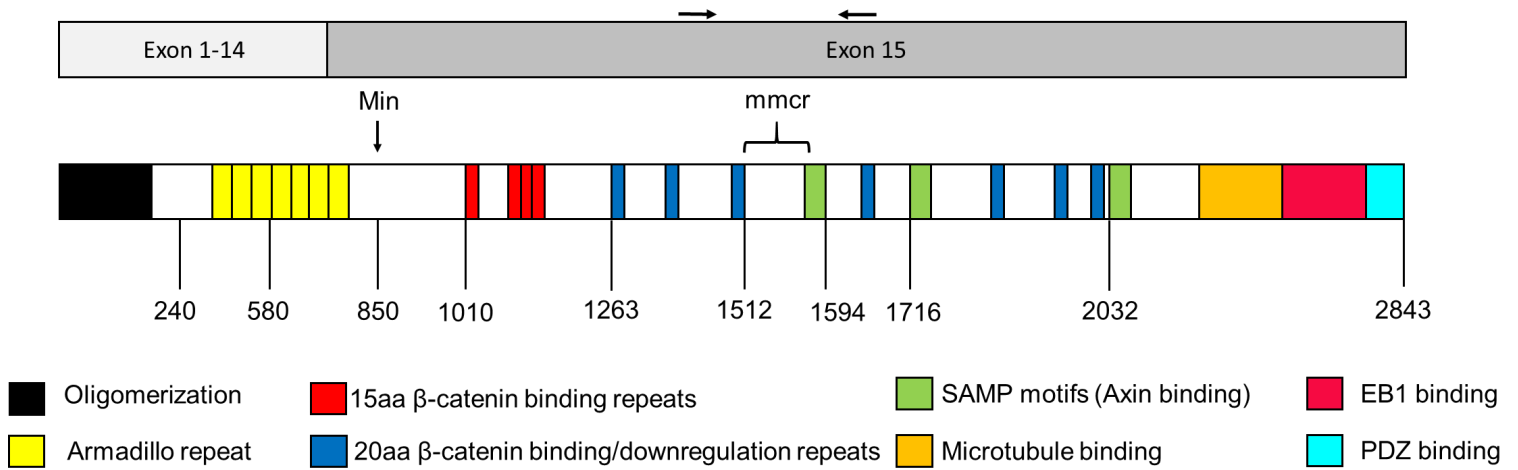

**Supplementary Table 1. Distribution of *Apc*<sup>mmcr</sup> mutations across individual mice.** Each “x” represents an independent tumor with the indicated mutation. M1, M2...M14 indicate individual mice. M1-M8 were exposed to DMBA. M9-14 were exposed to ENU.

| <b>DMBA</b> | M1  | M2 | M3 | M4 | M5 | M6  | M7  | M8 |
|-------------|-----|----|----|----|----|-----|-----|----|
| 1512 G>T    |     | x  | x  |    |    |     | x   |    |
| 1517 A>T    | xxx |    |    |    |    | x   |     | x  |
| 1520 G>T    |     |    |    |    | x  |     |     |    |
| 1522 A>T    |     | x  |    | x  | xx | xxx | x   |    |
| 1529 G>T    |     |    |    |    |    | x   |     |    |
| 1535 G>T    |     |    |    |    | x  |     | x   |    |
| 1540 C>T    |     |    |    |    |    |     |     | x  |
| 1542 G>T    | xx  |    | xx |    | xx |     | x   |    |
| 1543 G>T    |     |    | x  | x  |    |     |     |    |
| 1550 A>T    | xxx |    |    | x  | x  | xx  | xxx |    |
| 1554 A>T    |     |    |    |    |    | x   |     |    |
| 1558 G>T    |     |    |    |    |    | x   |     |    |
| 1559 A>T    |     |    |    |    |    |     | x   |    |
| 1517 Δ      |     | x  |    |    |    |     |     |    |
| 1530 +T     |     |    |    |    |    |     | xx  | x  |
| 1547 +T     |     |    |    |    |    |     |     | x  |
| 1554 +T     |     |    | x  |    |    |     |     |    |
| 1559+T      |     |    |    |    | x  |     |     |    |
| 1560 +G     |     |    |    | x  |    |     |     |    |
| Wt          |     | xx | x  | x  | xx |     | xx  |    |

| <b>ENU</b> | M9 | M10 | M11 | M12 | M13         | M14 |
|------------|----|-----|-----|-----|-------------|-----|
| 1516 C>T   | xx |     | x   | x   | x           |     |
| 1521 T>G   |    |     |     |     | x           |     |
| 1528 C>T   |    |     |     | x   |             | x   |
| 1529 G>T   | x  | x   | x   |     |             |     |
| 1535 G>T   |    |     |     |     | x           |     |
| 1538 C>A   |    | x   |     |     |             |     |
| 1540 C>T   | x  | xx  |     |     |             |     |
| 1544 C>A   | x  |     |     |     |             |     |
| 1548 C>T   |    | xx  | xx  | xx  |             |     |
| 1561 T>A   |    | xx  |     |     |             |     |
| 1562 T>A   |    | xx  |     |     |             |     |
| 1562 T>G   |    |     | x   |     |             | xx  |
| 1571 G>T   |    | xxx |     |     |             |     |
| 1573 T>A   |    |     |     |     |             | x   |
| 1575 G>T   |    |     | x   |     |             |     |
| 1576 T>A   | x  | x   | x   | xx  | x           | xx  |
| 1560 Δ     |    |     |     |     |             | x   |
| Wt         |    | x   | x   | xxx | xxxx<br>xxx |     |

**Supplementary Table 2. Strand-biased mutations are pervasive across a range of sequence contexts.** No one context was a hallmark of a single strand for either adenines or thymines, arguing against sequence-context dependent adduct formation.

\*Corresponds only to the NPBP. The bases 5' or 3' do not necessarily overlap with the indicated codon.

### DMBA Exposure

| <u>Sense Strand Adenines</u> |           |             |           |                 |                  | <u>Antisense Strand Adenines</u> |           |             |           |                  |  |
|------------------------------|-----------|-------------|-----------|-----------------|------------------|----------------------------------|-----------|-------------|-----------|------------------|--|
| <u>Codon*</u>                | <u>5'</u> | <u>NPBP</u> | <u>3'</u> | <u>mutation</u> | <u># mutants</u> | <u>Codon*</u>                    | <u>5'</u> | <u>NPBP</u> | <u>3'</u> | <u># mutants</u> |  |
| 1517                         | G         | A           | A         | A>T             | 5                | 1576                             | T         | A           | C         | 0                |  |
| 1522                         | A         | A           | G         | A>T             | 8                | 1573                             | T         | A           | A         | 0                |  |
| 1550                         | T         | A           | A         | A>T             | 10               | 1562                             | T         | A           | A         | 0                |  |
| 1554                         | A         | A           | A         | A>T             | 1                | 1561                             | T         | A           | A         | 0                |  |
| 1559                         | A         | A           | A         | A>T             | 1                | 1521                             | T         | A           | A         | 0                |  |

### ENU Exposure

| <u>Sense Strand Thymines</u> |           |             |           |                 |                  | <u>Antisense Strand Thymines</u> |           |             |           |                  |  |
|------------------------------|-----------|-------------|-----------|-----------------|------------------|----------------------------------|-----------|-------------|-----------|------------------|--|
| <u>Codon*</u>                | <u>5'</u> | <u>NPBP</u> | <u>3'</u> | <u>mutation</u> | <u># mutants</u> | <u>Codon*</u>                    | <u>5'</u> | <u>NPBP</u> | <u>3'</u> | <u># mutants</u> |  |
| 1521                         | T         | T           | A         | T>G             | 1                | 1559                             | T         | T           | T         | 0                |  |
| 1561                         | T         | T           | A         | T>A             | 2                | 1554                             | T         | T           | T         | 0                |  |
| 1562                         | T         | T           | A         | T>A             | 2                | 1550                             | T         | T           | A         | 0                |  |
|                              |           |             |           | T>G             | 3                | 1522                             | C         | T           | T         | 0                |  |
| 1573                         | T         | T           | A         | T>A             | 1                | 1517                             | T         | T           | C         | 0                |  |
| 1576                         | G         | T           | A         | T>A             | 8                |                                  |           |             |           |                  |  |
